# Supplementary material for: Preparation of β-cyclodextrin/polysaccharide foams using saponin
Source: publisher site journal article supplement (doi:10.3762/bjoc.19.7), 2023-01-24
Supplement: Additional file 1 [file 1860-5397-19-7-S1.pdf]

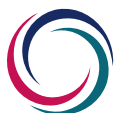

## Supporting Information

for

### Preparation of $\beta$ -cyclodextrin/polysaccharide foams using saponin

Max Petitjean and José Ramón Isasi

*Beilstein J. Org. Chem.* **2023**, *19*, 78–88. doi:10.3762/bjoc.19.7

**Percent yields reached following different synthetic paths, additional SEM micrographs, infrared spectra of the samples in the fingerprint region, table with compositions of the reacting mixtures**

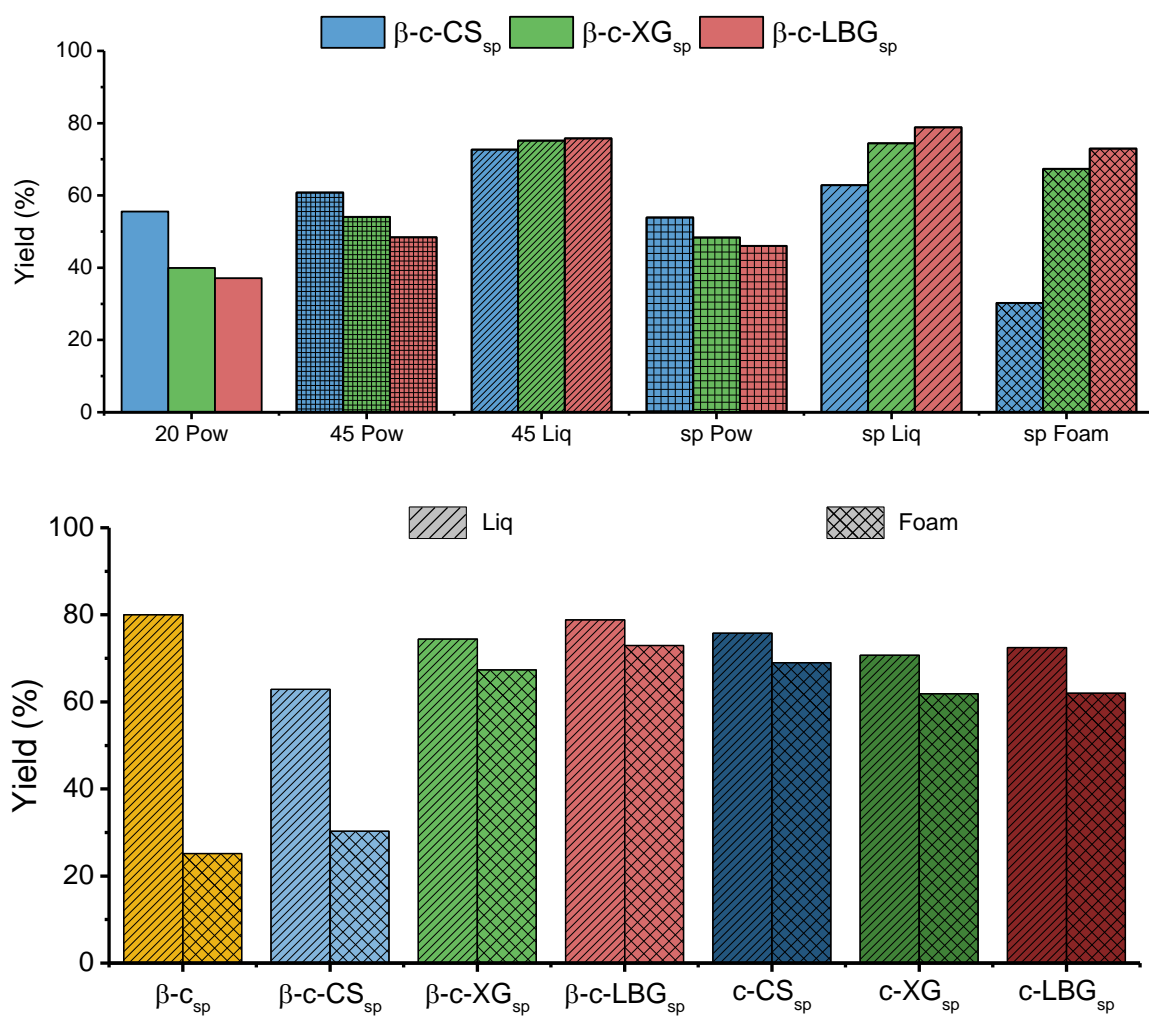

**Figure S1.** Percent yields reached following different synthetic paths (top) and comparison of the last two methods prepared using different CD:PS ratios (bottom).

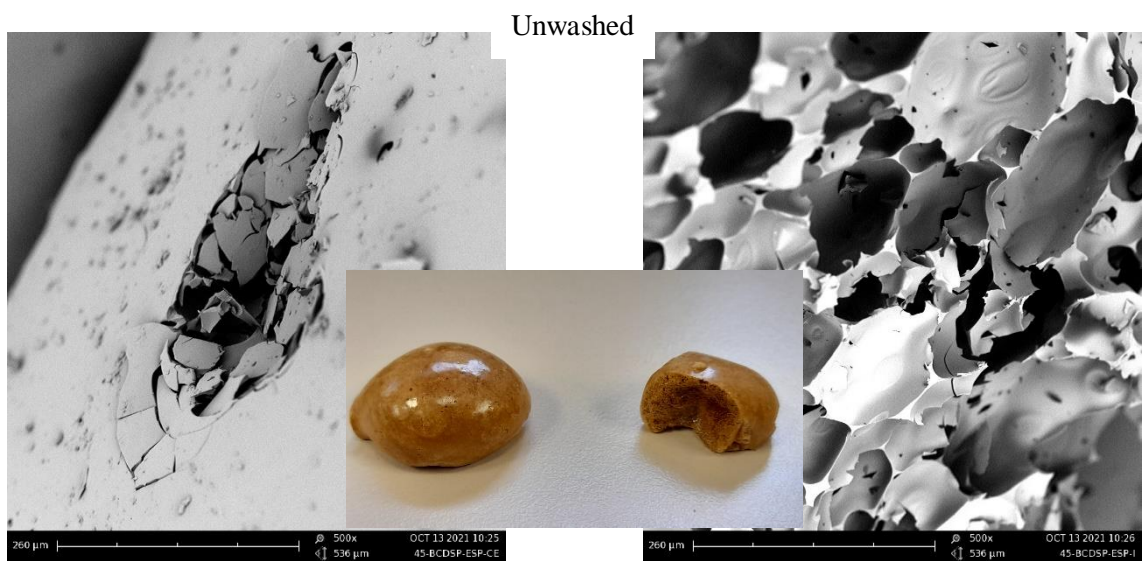

**Figure S2.** SEM of  $\beta$ -csp matrix unwashed showing outer (left) and inner(right) micrographs.

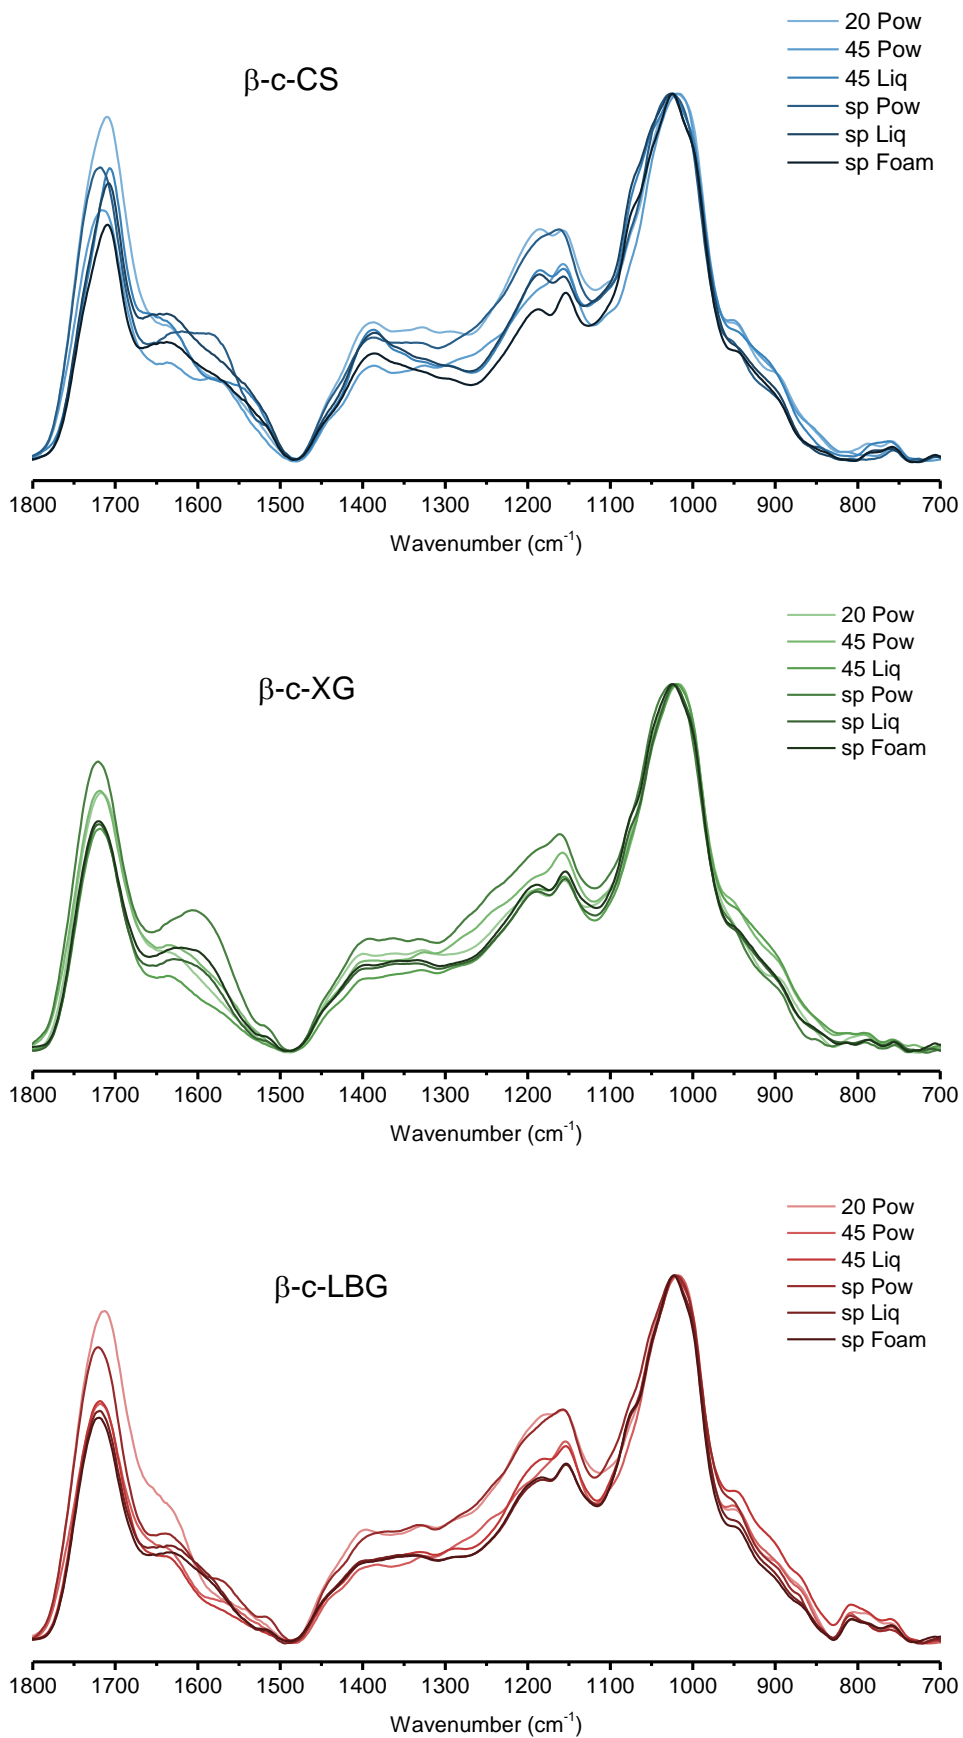

**Figure S3.** Infrared spectra in the fingerprint region for the three polysaccharide matrices as a function of the preparation method.

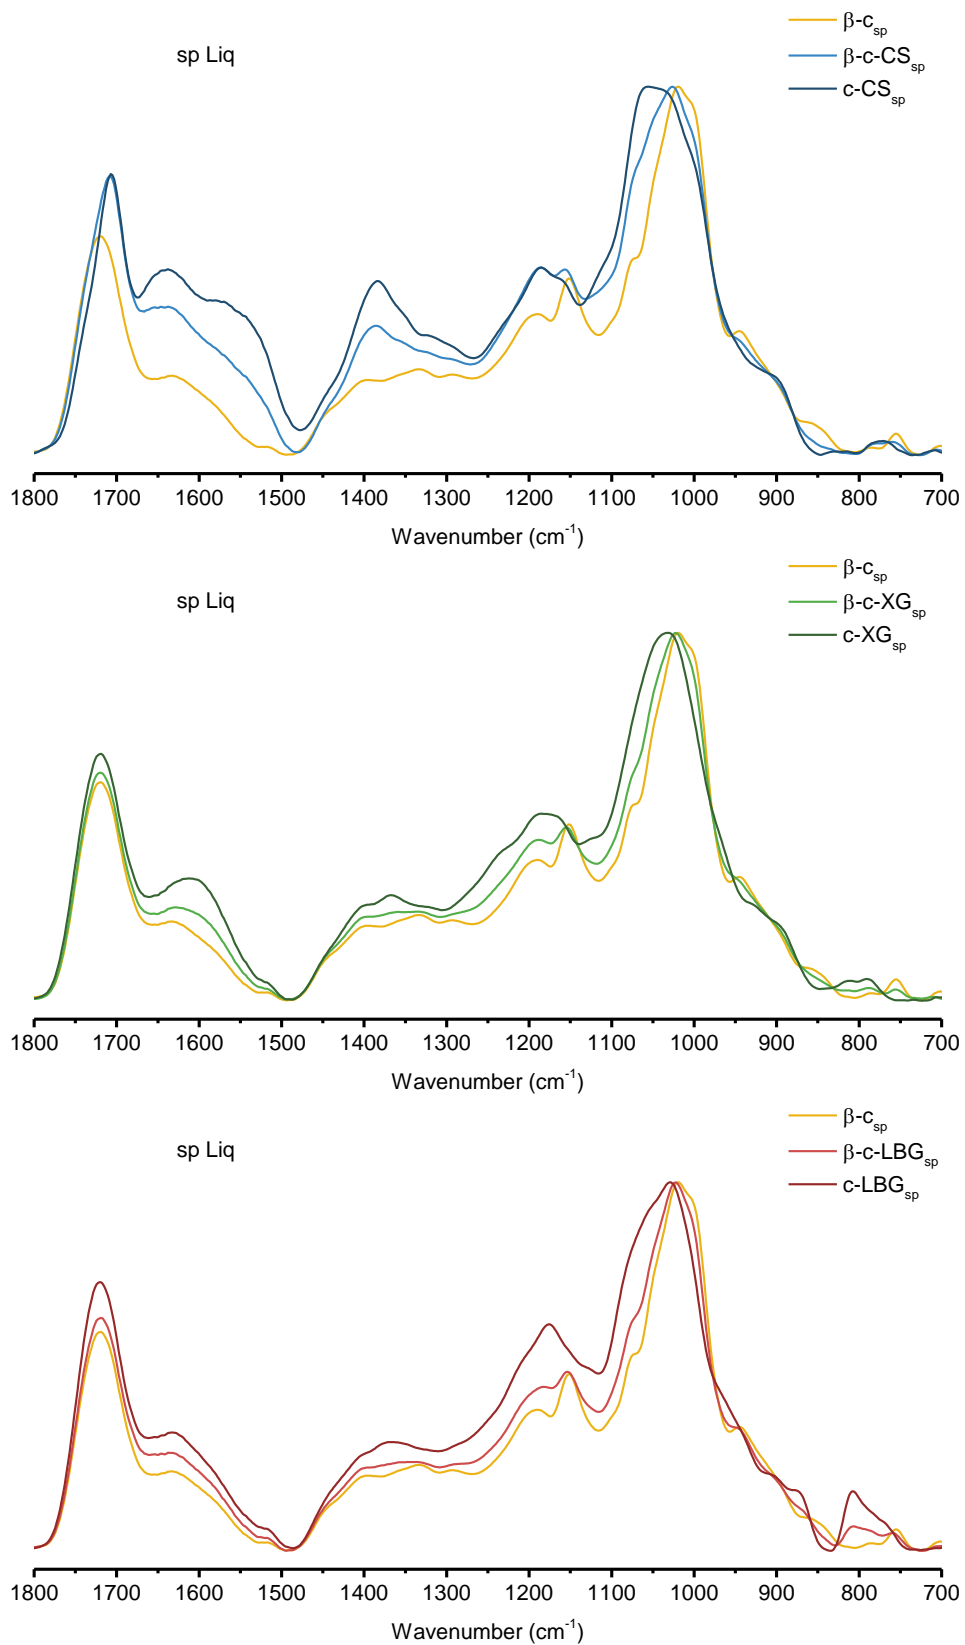

**Figure S4.** Infrared spectra in the fingerprint region for matrices prepared using saponin by the “liquid path” for pure crosslinked cyclodextrin compared to the three polysaccharides with or without cyclodextrin.

**Table S1.** Amounts of components (in g) used to prepare saponin crosslinked matrices.

| <b>Names</b>                                 | <b>CTR</b> | <b>XG</b> | <b>LBG</b> | <b>CS</b> | <b><math>\beta</math>CD</b> | <b>Sapo</b> | <b>Na<sub>2</sub>HPO<sub>4</sub></b> |
|----------------------------------------------|------------|-----------|------------|-----------|-----------------------------|-------------|--------------------------------------|
| <b>c-XG<sub>sp</sub></b>                     | 1.3        | 1.5       | /          | /         | /                           | 0.5         | 0.28                                 |
| <b>c-LBG<sub>sp</sub></b>                    | 1.3        | /         | 1.5        | /         | /                           | 0.5         | 0.28                                 |
| <b>c-CS<sub>sp</sub></b>                     | 1.3        | /         | /          | 1.5       | /                           | 0.5         | 0.28                                 |
| <b><math>\beta</math>-c-XG<sub>sp</sub></b>  | 1.3        | 0.75      | /          | /         | 0.75                        | 0.5         | 0.28                                 |
| <b><math>\beta</math>-c-LBG<sub>sp</sub></b> | 1.3        | /         | 0.75       | /         | 0.75                        | 0.5         | 0.28                                 |
| <b><math>\beta</math>-c-CS<sub>sp</sub></b>  | 1.3        | /         | /          | 0.75      | 0.75                        | 0.5         | 0.28                                 |
| <b><math>\beta</math>-csp</b>                | 1.3        | /         | /          | /         | 1.5                         | 0.5         | 0.28                                 |
